# Supplementary material for: Copper–nickel embedded into a nitrogen-doped carbon octahedron as an effective bifunctional electrocatalyst
Source: Royal Society of Chemistry journal article supplement (doi:10.1039/c8qi00608c), 2018-01-01
Supplement: c8qi00608c1.pdf [file c8qi00608c1.pdf]

# † Electronic Supplementary Information

## **Copper-nickel embedded into nitrogen-doped carbon octahedron as effective bifunctional electrocatalyst**

*Lulu Qiao, Anquan Zhu, Huan Yang, Weixuan Zeng, Rui Dong, Pengfei Tan, Donglin Zhong, Quanyin Ma and Jun Pan\**

*State Key Laboratory for Powder Metallurgy, Central South University, Changsha 410083, P. R. China*

*\*Corresponding Author. Email: [jun.pan@csu.edu.cn](mailto:jun.pan@csu.edu.cn)*

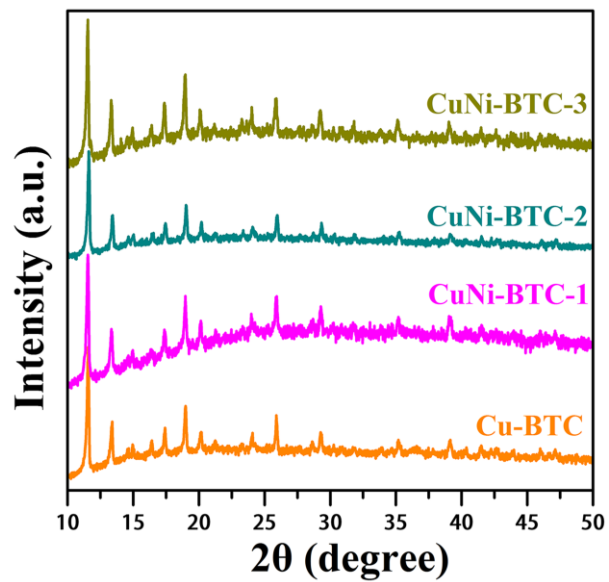

Fig. S1 XRD patterns of as-prepared CuNi-BTC and Cu-BTC precursors.

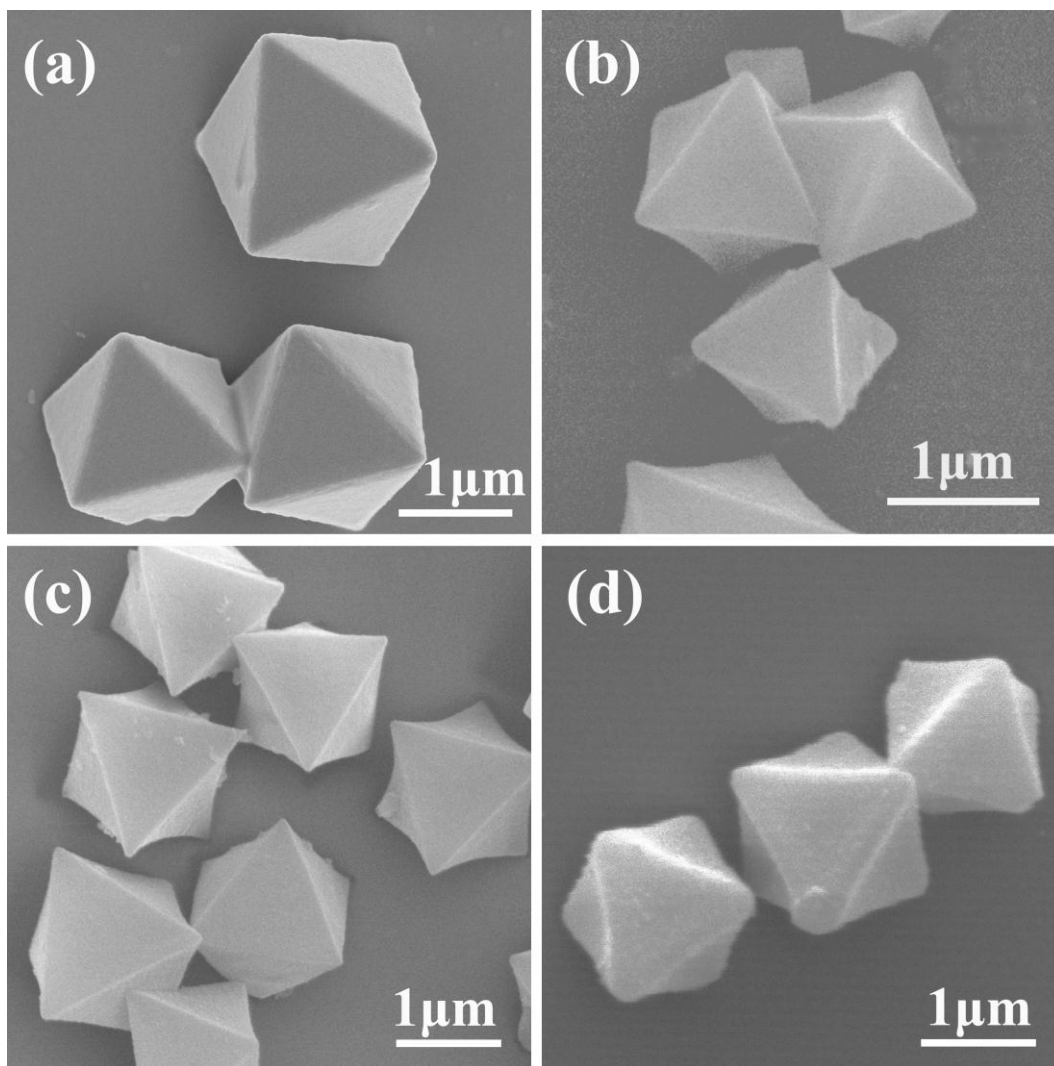

Fig. S2 SEM images of as-prepared precursors. (a) Cu-BTC, (b) CuNi-BTC-1, (c) CuNi-BTC-2, (d) CuNi-BTC-3.

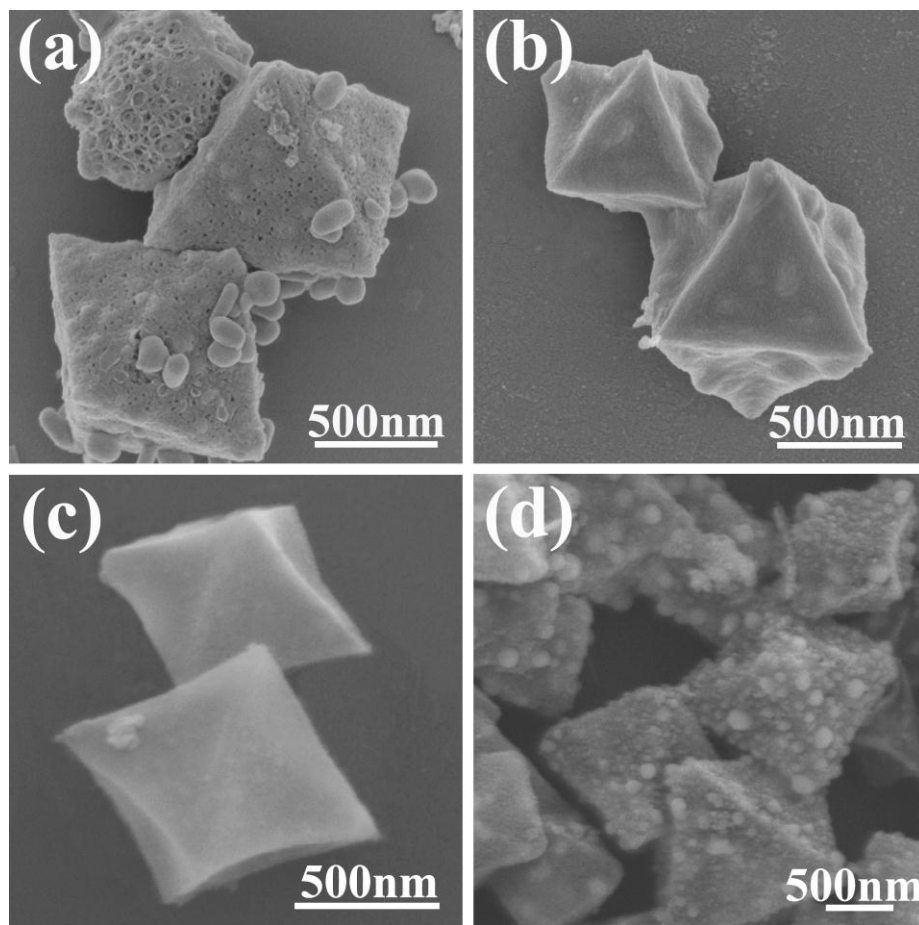

Fig. S3 SEM images of as-synthesized samples. (a) Cu-NC, (b) CuNi-NC-1, (c) CuNi-NC-2, (d) CuNi-NC-3.

**Table S1** Summary of element contents of CuNi-NC-2 and Cu-NC.

| Samples   | Relative content (At. %) |      |      |      |
|-----------|--------------------------|------|------|------|
|           | C                        | N    | Cu   | Ni   |
| Cu-NC     | 90.97                    | 4.48 | 4.55 | --   |
| CuNi-NC-2 | 96.97                    | 2.3  | 0.42 | 0.32 |

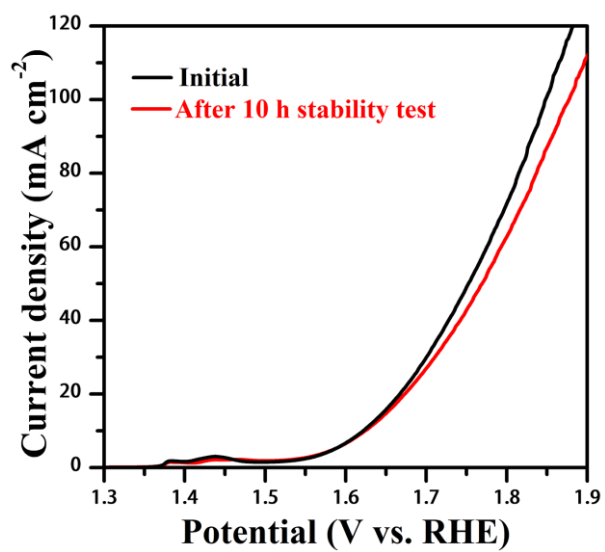

Fig. S4 LSV curves of CuNi-NC-2 sample before and after OER stability test for 10 h.

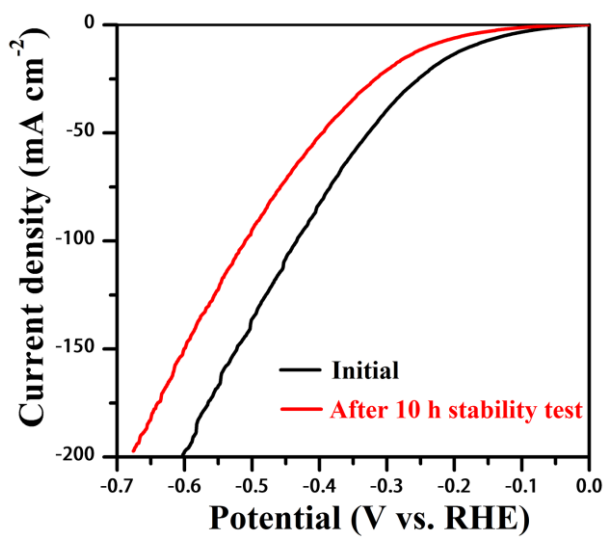

Fig. S5 LSV curves of CuNi-NC-1 sample before and after HER stability test for 10 h.

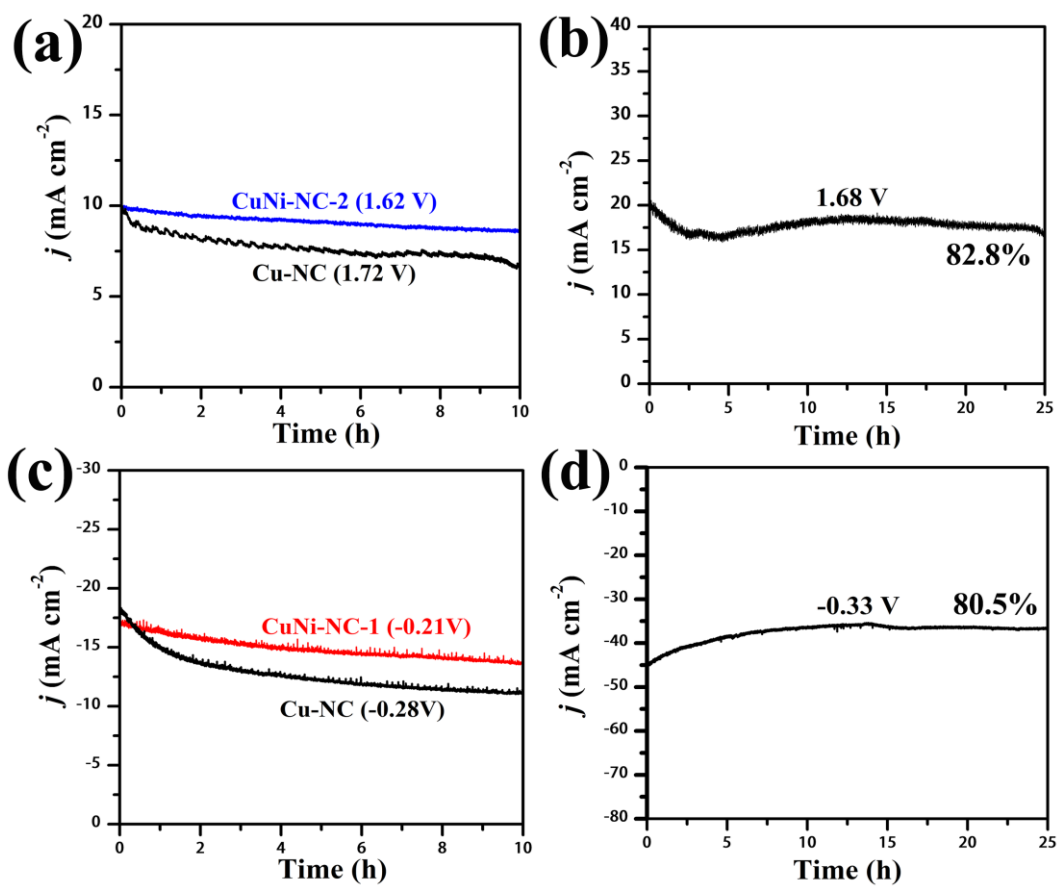

Fig. S6 Chronoamperometry curves of (a) Cu-NC and CuNi-NC-2 in OER process, (b) CuNi-NC-2 sample at a higher potential (1.68 V) for 25 h, (c) Cu-NC and CuNi-NC-1 in HER process, (d) CuNi-NC-1 sample at a higher potential (-0.33 V) for 25 h.

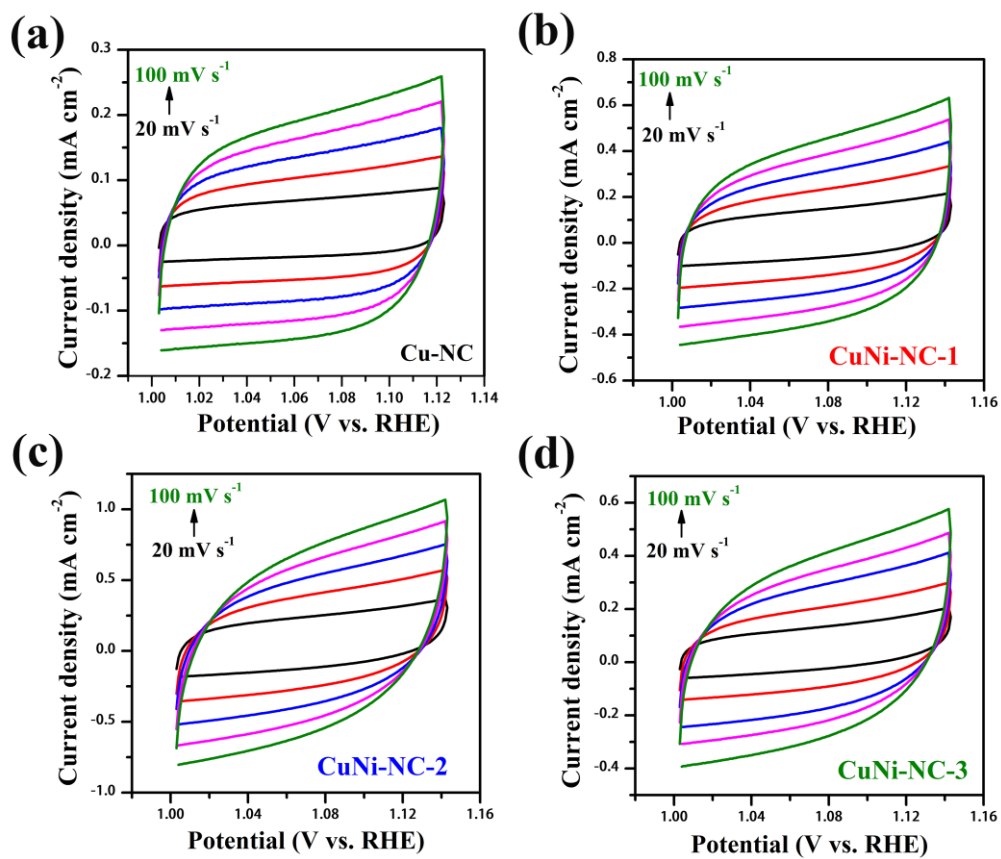

Fig. S7 CV curves of all samples. (a) Cu-NC, (b) CuNi-NC-1, (c) CuNi-NC-2, (d) CuNi-NC-3.

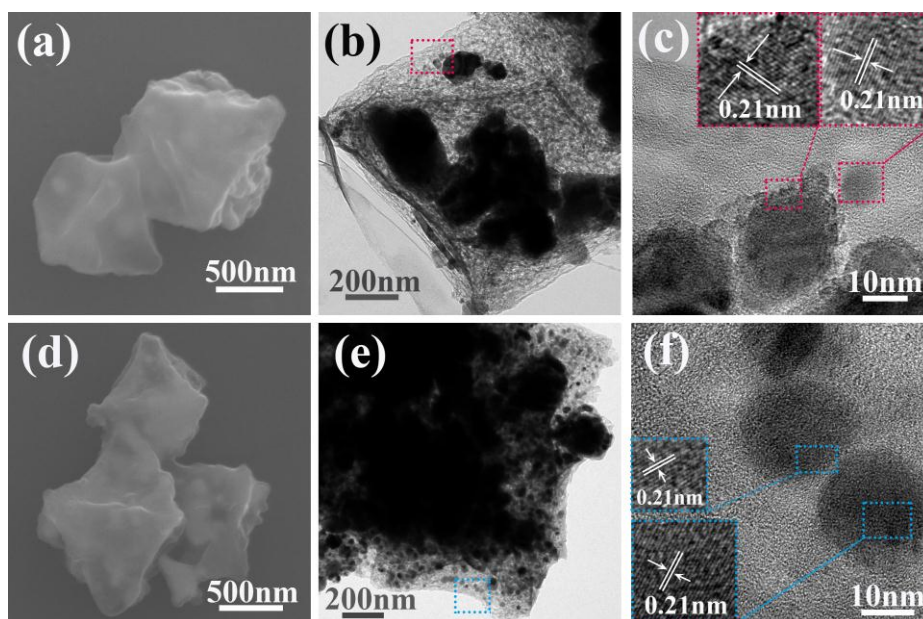

Fig. S8 (a) SEM image, (b) TEM and (c) HRTEM images (inset) of CuNi-NC-2 after 25 h stability test for OER, (d) SEM image, (e) TEM and (f) HRTEM images (inset) of CuNi-NC-1 after 25 h stability test for HER process.

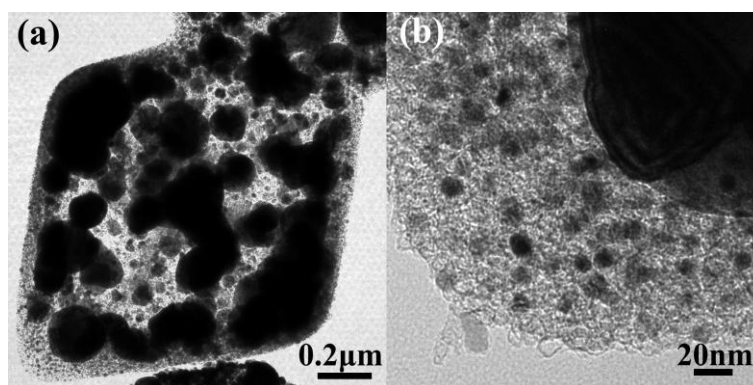

Fig. S9 (a) and (b) TEM images of as-obtained CuNi-NC-1 sample.
